# Supplementary material for: miR-122 and Ago interactions with the HCV genome alter the structure of the viral 5′ terminus
Source: PubMed Central journal article supplement — Nucleic Acids Res. 2019 Apr 3;47(10):5307–24. doi: 10.1093/nar/gkz194 (PMC6547439; doi:10.1093/nar/gkz194), 2019-04-03
Supplement: gkz194_supplemental_file.pdf [file gkz194_supplemental_file.pdf]

**Supplementary Figure S1. miR-124 does not interact with the HCV 5' terminus and miR-122 binds with higher affinity to Site 1 in 1-42 nt HCV RNA.** (A) Non-denaturing gel electrophoresis mobility shift assay (EMSA) of 1-42 nt HCV RNA and increasing amounts of miR-124. (B) Thermogram and resulting binding curve of the titration of 1-42 nt HCV RNA with native miR-124. n.b. = no binding. (C) Model of the interaction of miR-122 (purple) and the 1-42 nt of the HCV Site 2p3,4 mutant (black), containing mutations in positions 3 and 4 of the miR-122 seed sequence of Site 2 (red). (D) Non-denaturing gel electrophoresis mobility shift assay (EMSA) of 1-42 nt HCV Site 2p3,4 RNA and increasing amounts of miR-122. (E) Thermogram and resulting binding curve of the titration of 1-42 nt HCV Site 2p3,4 with miR-122. Affinities of each binding Site ( $K_d1$ , Site 1 and  $K_d2$ , Site 2) are indicated. All data are representative of at least three independent replicates and  $K_d$  values are an average of three measurements ( $\pm$ ) error propagated from individual fits.

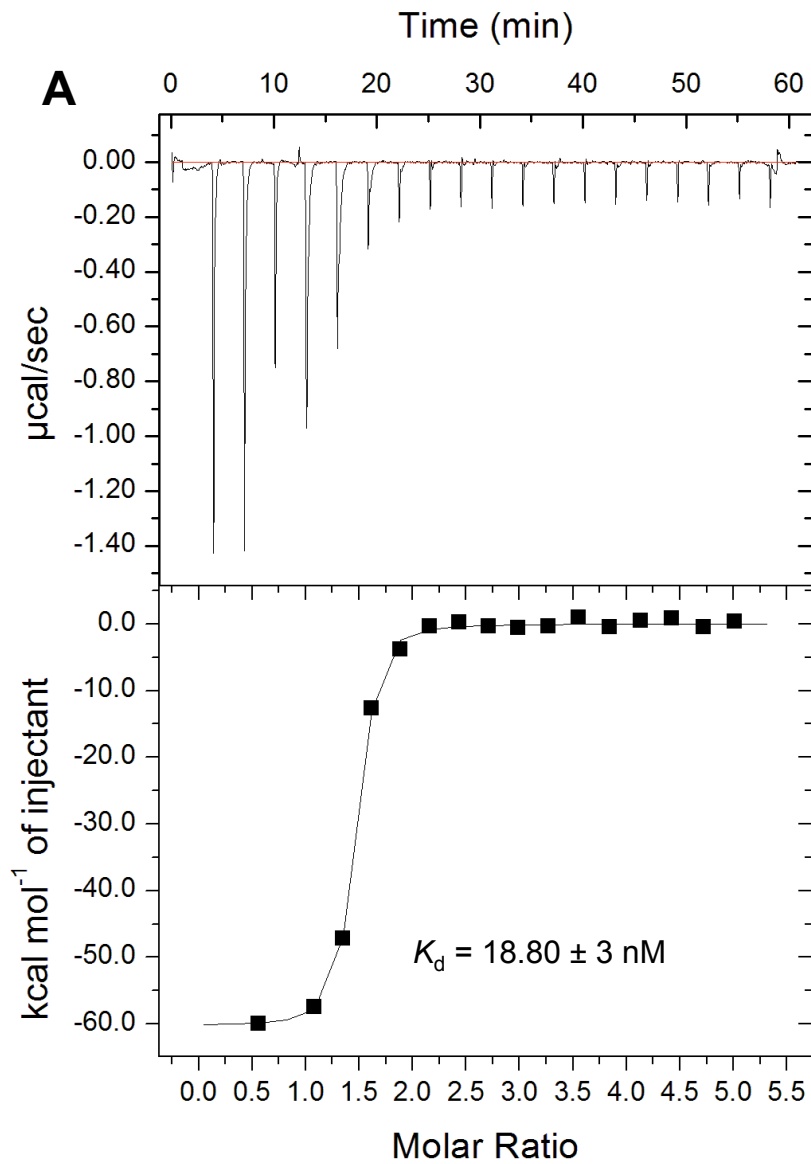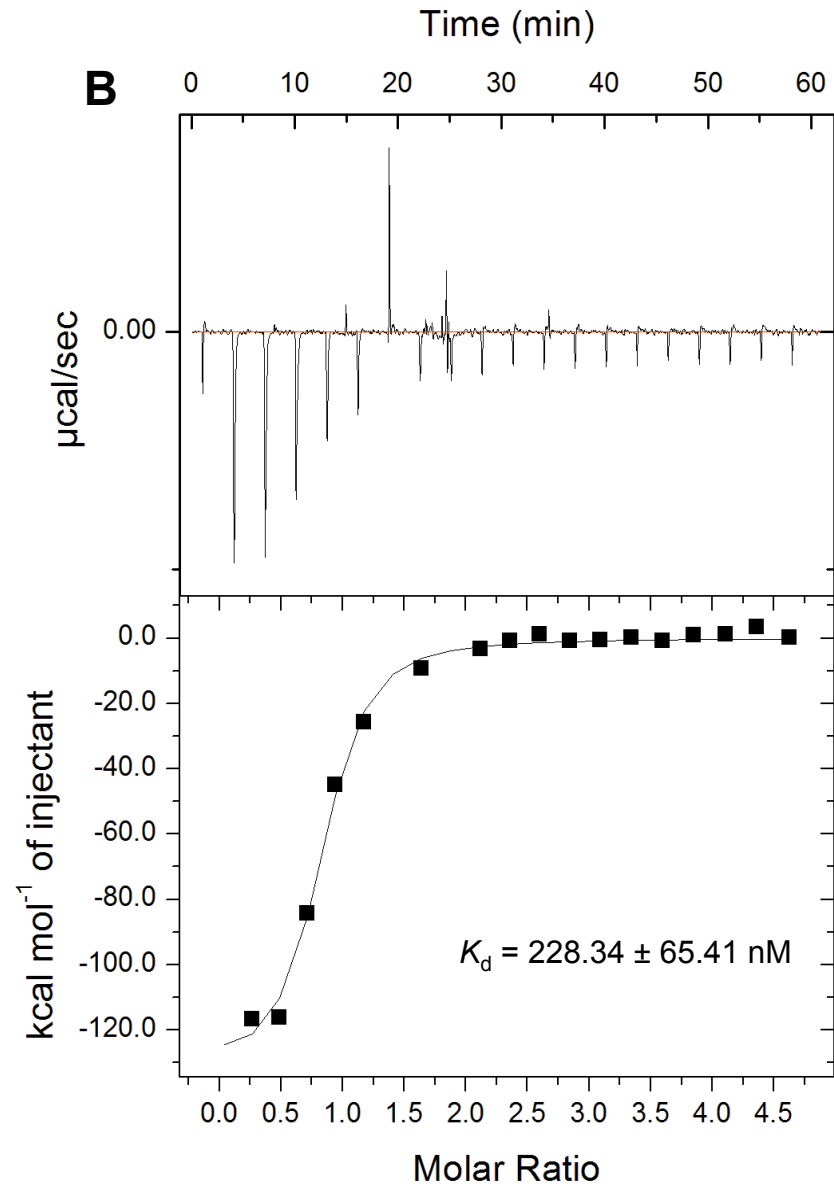

**Supplementary Figure S2. miR-122 interactions with Site 1 and Site 2 of the HCV RNA.** Isothermal titration calorimetry (ITC) thermograms and resulting binding curve of the titration of (A) Site 1 (nts 1-27) and (B) Site 2 (nts 29-42) of the HCV RNA with miR-122. All data are representative of at least three independent replicates and  $K_d$  values are an average of three measurements ( $\pm$ ) error propagated from individual fits.

**A**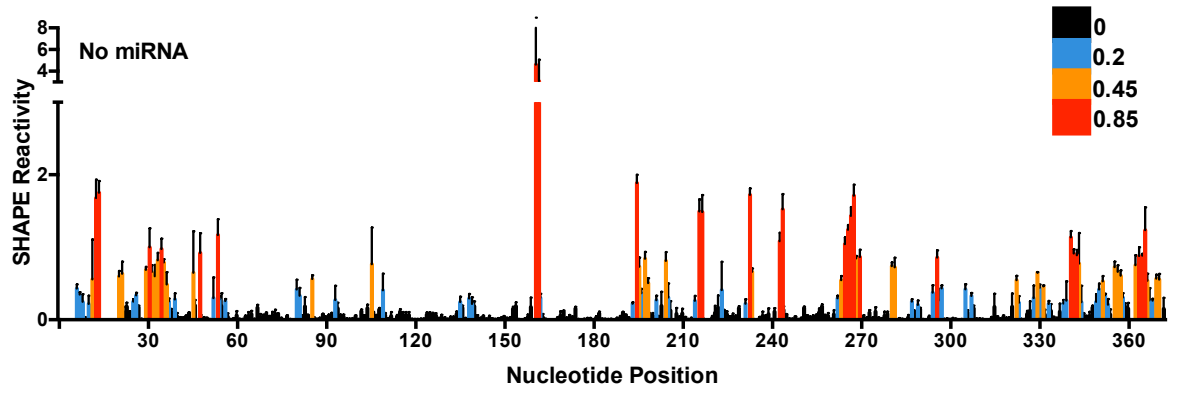**B**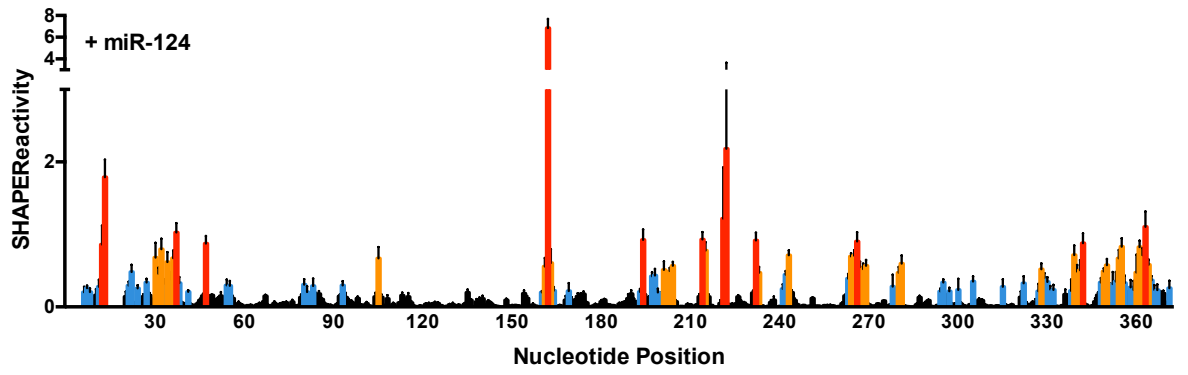**C**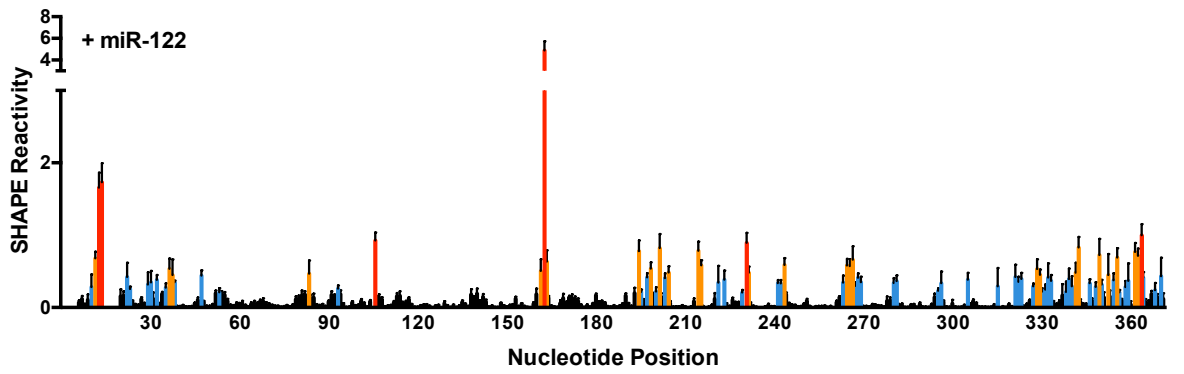**D**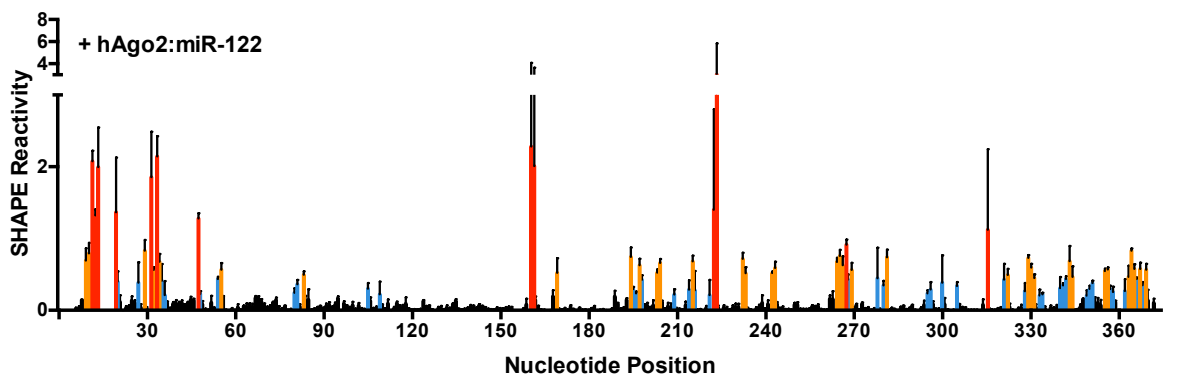

**Supplementary Figure S3. *In vitro* SHAPE analysis of HCV 5' UTR by capillary electrophoresis.** Normalized SHAPE reactivities of nts 1-371 of the HCV RNA with **(A)** no miRNA, **(B)** miR-124, **(C)** miR-122, and **(D)** hAgo2:miR-122. Nucleotides 1-5 and 14-19 were omitted due to high background reactivity. Nucleotides with high ( $\geq 0.85$ , red), intermediate (between 0.4 and 0.85, orange), low (between 0.2 and 0.4, blue) and very low ( $\leq 0.2$ , black) SHAPE reactivity are indicated. The data represents the results of at least four independent replicates and error bars represent the standard error of the mean (SEM).



**Supplementary Figure S4. *In vitro* SHAPE analysis of HCV RNA by gel electrophoresis.** (A) Normalized SHAPE reactivity of 1-42 nt HCV RNA with miR-122 and (B) miR-124 (control). Nucleotides 1-5 were omitted due to high background reactivity. Nucleotides with high ( $\geq 0.85$ , red), intermediate (between 0.4 and 0.85, orange), low (between 0.2 and 0.4, blue) and very low ( $\leq 0.2$ , black) SHAPE reactivity are indicated. (C) Representative SHAPE analysis by gel electrophoresis of HCV RNA with miR-122 and miR-124 (control) (D) Graph showing the changes in SHAPE reactivity upon miR-122 binding,  $\Delta\text{SHAPE} = \text{miR-122 reactivity} - \text{miR-124 reactivity}$ . Significant increases (above baseline, red) and decreases in reactivity (below baseline, blue) are indicated. (E) Changes in reactivity upon miR-122 binding are shown on the miR-122: HCV RNA secondary structure model, coloured as in (D). Data is representative of at three independent replicates and error bars represent the standard error of the mean (SEM).

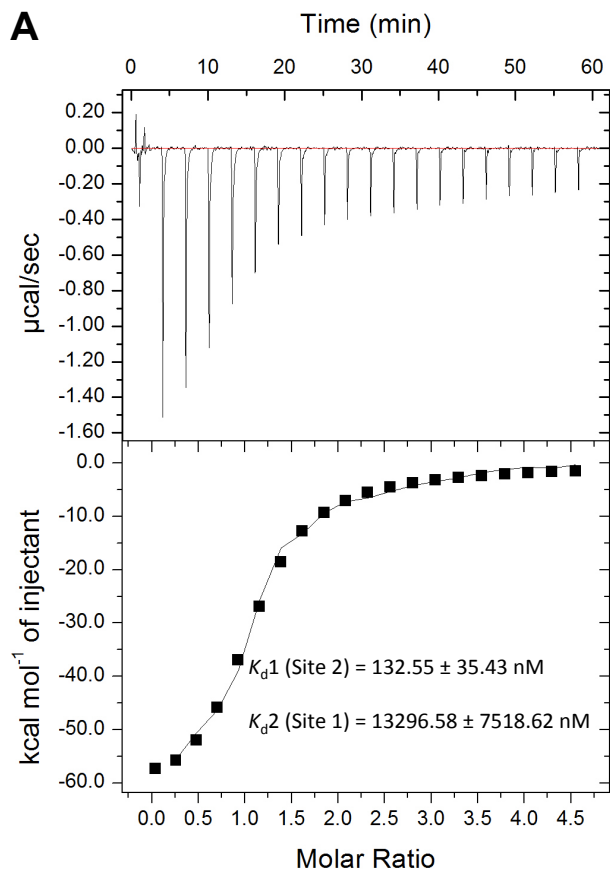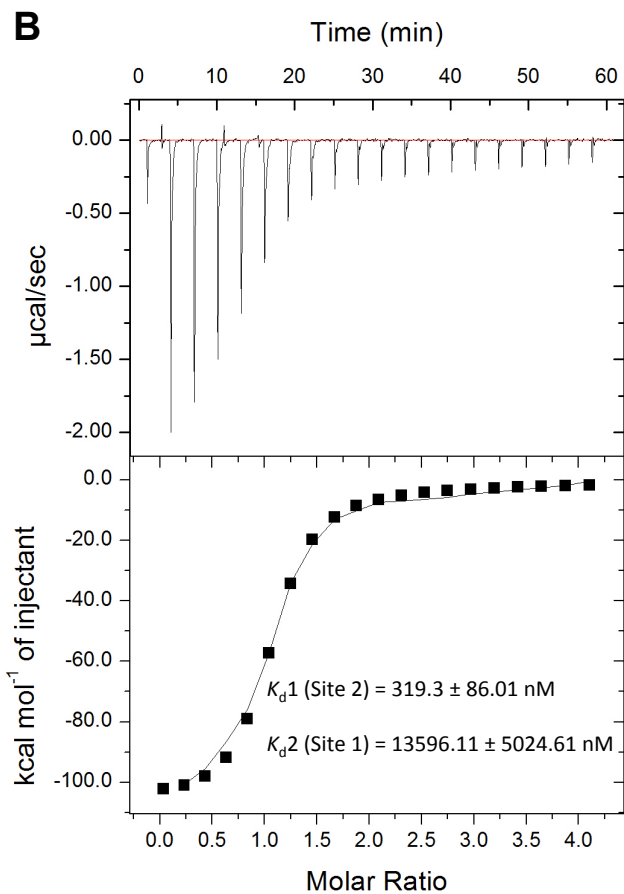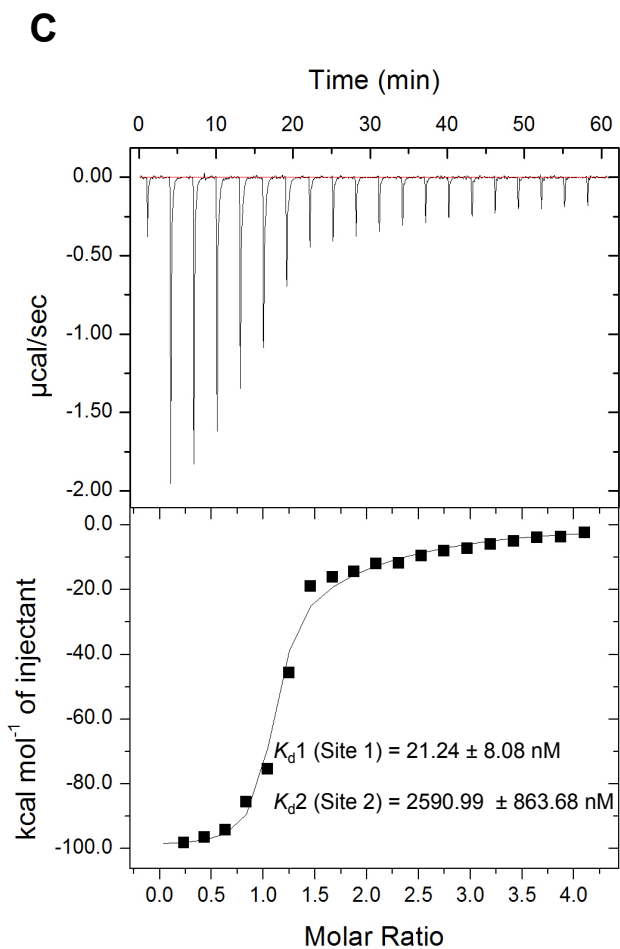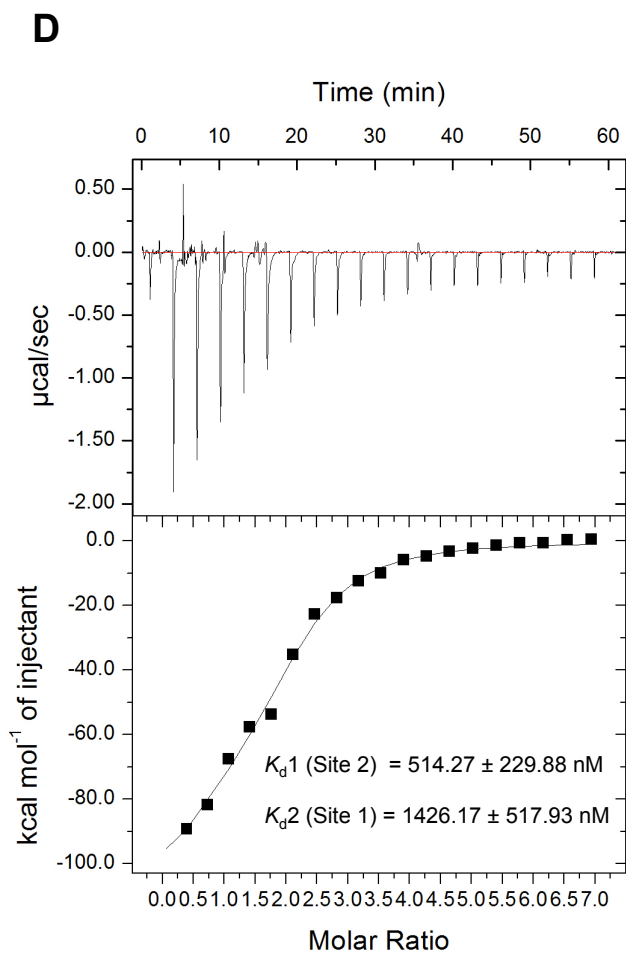



**Supplementary Figure S5. miR-122 interactions with WT, S2p5,6, G28A 1-117 nt and WT 1-371 nt HCV RNA.** Isothermal titration calorimetry (ITC) thermograms and resulting binding curve of the titration of miR-122 with 1-117 nt **(A)** WT, **(B)** Site 2 p5,6, and **(C)** G28A HCV RNA as well as with **(D)** 1-371 WT HCV RNA. All data are representative of at least three independent replicates and  $K_d$  values are an average of three measurements ( $\pm$ ) error propagated from individual fits.

**A**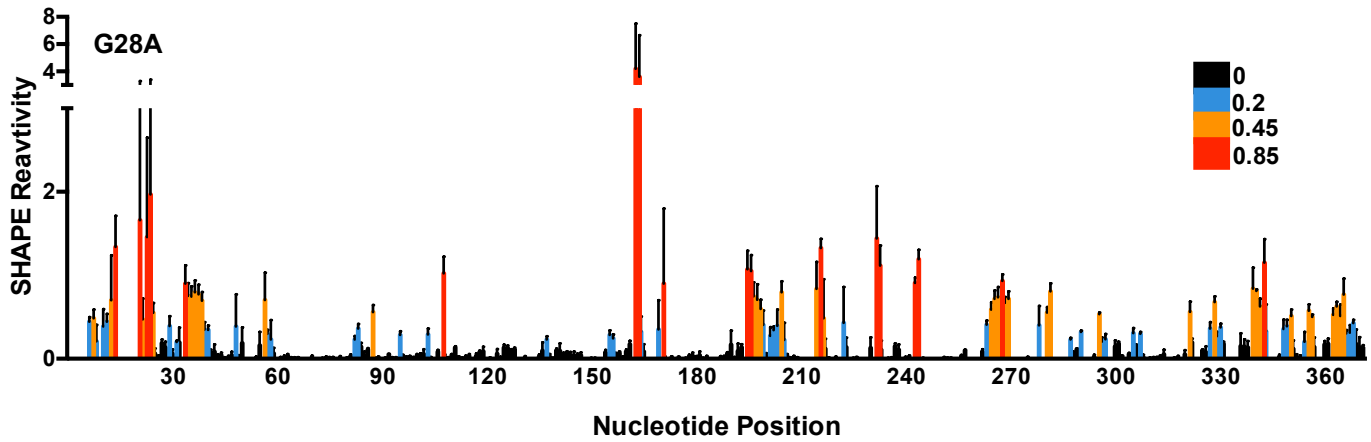**B**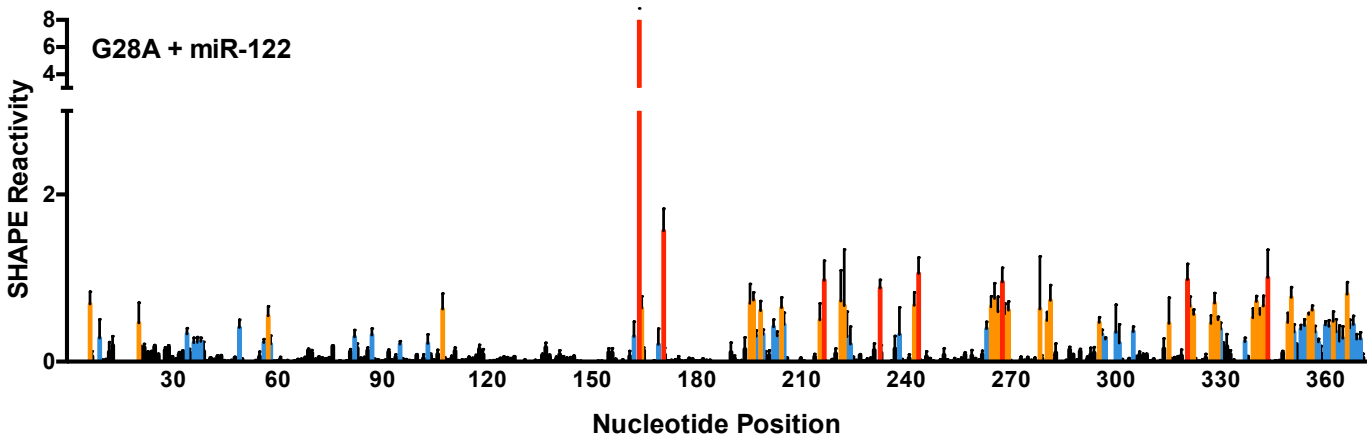

**Supplementary Figure S6. *In vitro* SHAPE analysis of G28A 5' UTR by capillary electrophoresis.** Normalized SHAPE reactivities of nts 1-371 of the G28A HCV RNA with (A) no miRNA or (B) + miR-122. Nucleotides 1-5 and 14-19 were omitted due to high background reactivity. Nucleotides with high ( $\geq 0.85$ , red), intermediate (between 0.4 and 0.85, orange), low (between 0.2 and 0.4, blue) and very low ( $\leq 0.2$ , black) SHAPE reactivity are indicated. The data represents the results of four independent replicates and error bars represent the standard error of the mean (SEM).

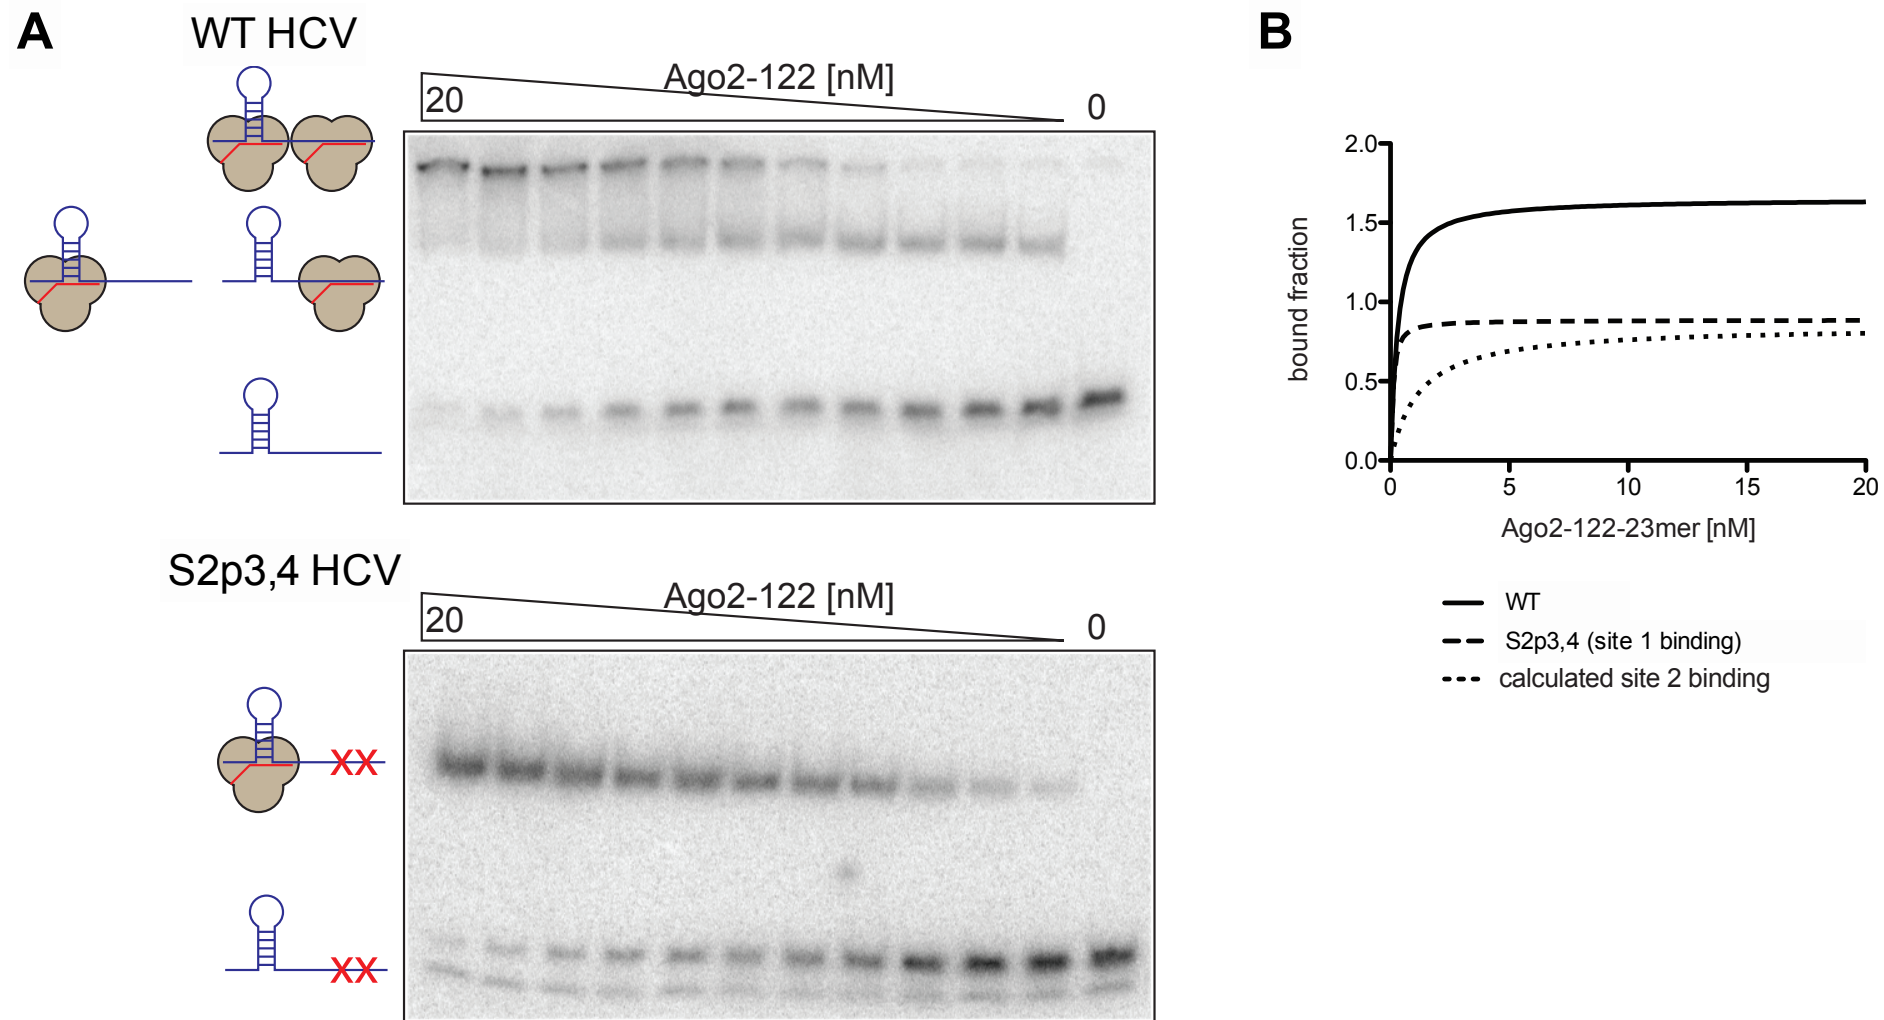

**Supplementary Figure S7. Determination of dissociation constants for the Ago2:miR-122 HCV complexes. (A)** Examples of electrophoretic mobility shift assay results used for the binding data in **Figure 4B**. Recombinantly expressed hAgo2 loaded with miR-122 (final concentration: 20, 10, 5, 2.5, 1.25, 0.625, 0.3125, 0.15625, 0.078125, 0.0390625, 0.01953125, and 0 nM) was incubated with radiolabeled viral RNA comprising nts 1-42 of WT (top) or S2p3,4 HCV RNA. Single and double shifts are indicated by cartoons. The depicted gels are one of three independent replicates. **(B)** Equilibrium binding curves for Ago2:miR-122 and WT (two binding sites), S2p3,4 (Site 1), and the calculated Site 2 (WT minus Site 1) HCV RNA, using Equation 1 (see Materials & Methods).

**A**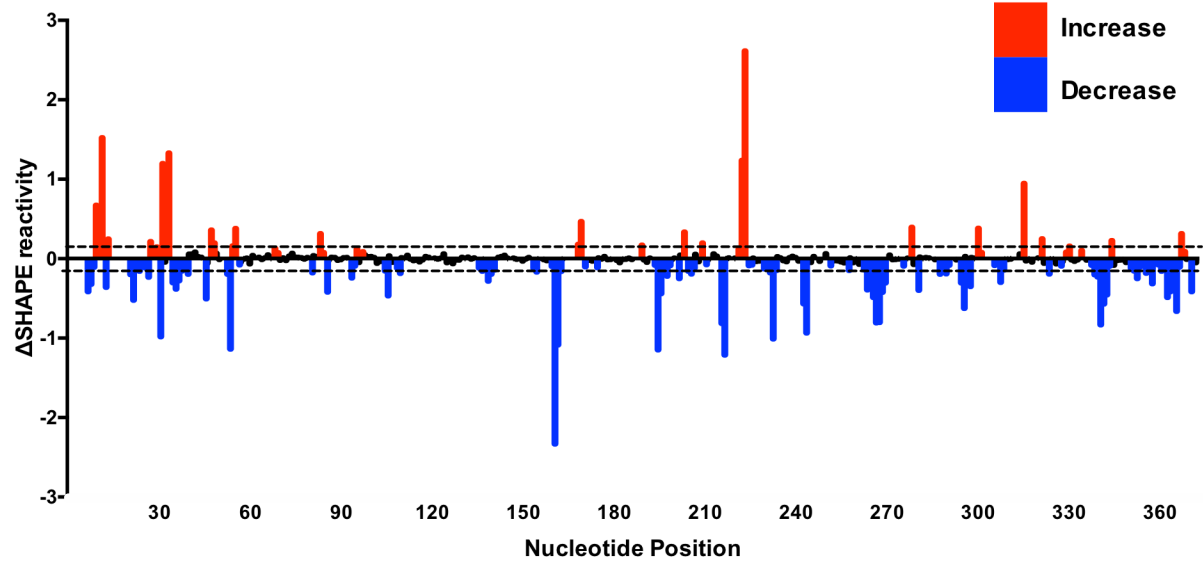**B**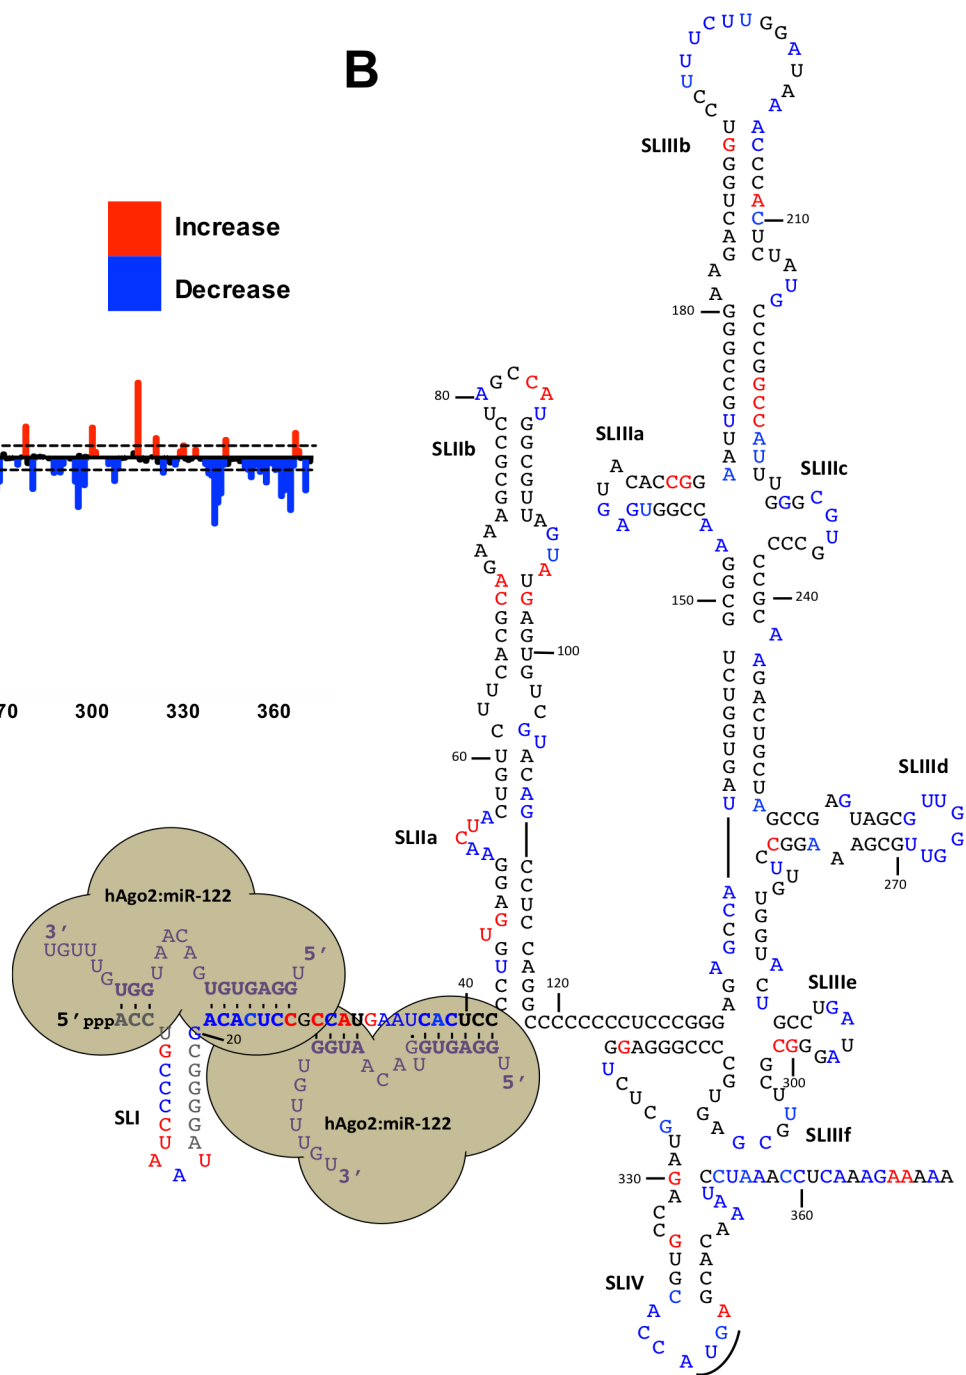

**Supplementary Figure S8. Changes in SHAPE reactivity upon hAgo2:miR-122 binding to the entire HCV 5' UTR. (A)** Difference plot showing changes in SHAPE reactivity upon hAgo2:miR-122 binding,  $\Delta\text{SHAPE} = \text{hAgo2:miR-122 reactivity} - \text{HCV RNA reactivity}$ . Significant increases (above baseline, red) and decreases in reactivity (below baseline, blue) are indicated. **(B)** Changes in reactivity upon hAgo2:miR-122 binding are superimposed onto the secondary structure of the HCV 5' UTR (coloured as in **(A)**).
